# Supplementary material for: Prediction and validation of the structural features of Ov58GPCR, an immunogenic determinant of Onchocerca volvulus
Source: PubMed Central journal article supplement (PMC6157839; doi:10.1371/journal.pone.0202915), 2018-09-26
Supplement: pone.0202915.s008.pdf [file pone.0202915.s008.pdf]

| <b>Peptide</b>                           | <b>Mw (Da)</b> | <b>Secondary structure type</b> | <b>pI</b>   | <b>AA<sup>b</sup></b> | <b>GV</b>     | <b>AI</b>    |
|------------------------------------------|----------------|---------------------------------|-------------|-----------------------|---------------|--------------|
| <b>P1:<br/>CVEEDMPEKVINDSQM<br/>TLRI</b> | <b>2350.70</b> | <b>Coil/strand</b>              | <b>4.18</b> | <b>139 - 158</b>      | <b>-0.425</b> | <b>87.5</b>  |
| <b>P2:<br/>IRRLINEESEEQKAV</b>           | <b>1814.03</b> | <b>Helix</b>                    | <b>4.95</b> | <b>383 - 398</b>      | <b>-1.060</b> | <b>104.0</b> |
| <b>P3:<br/>QQIDPLDAEHSRGFV</b>           | <b>1711.85</b> | <b>Coil</b>                     | <b>4.54</b> | <b>52 - 66</b>        | <b>-0.727</b> | <b>78.0</b>  |
| <b>P4:<br/>CVEEDMPEKVIN</b>              | <b>1405.60</b> | <b>Coil</b>                     | <b>4.0</b>  | <b>139 - 150</b>      | <b>-0.475</b> | <b>80.8</b>  |
