# Supplementary material for: Prediction and validation of the structural features of Ov58GPCR, an immunogenic determinant of Onchocerca volvulus
Source: PubMed Central journal article supplement (PMC6157839; doi:10.1371/journal.pone.0202915), 2018-09-26
Supplement: pone.0202915.s009.pdf [file pone.0202915.s009.pdf]

| Peptide         | Area Under the ROC Curve (AUC) | Standard Error | 95% CI for ROC AUC | p value | Selected cutoff | Sensitivity for selected cutoff and 95% CI | Specificity for selected cutoff and 95% CI | Positive likelihood ratio and 95% CI for selected cutoff | Negative likelihood ratio and 95% CI for selected cutoff |
|-----------------|--------------------------------|----------------|--------------------|---------|-----------------|--------------------------------------------|--------------------------------------------|----------------------------------------------------------|----------------------------------------------------------|
| Peptide 1       | 0.977                          | 0.0135         | [0.918 - 0.997]    | <0.0001 | 0.5599          | 96.67 [82.8 - 99.9]                        | 92.59 [82.1 - 97.9]                        | 13.05 [5.1 - 33.6]                                       | 0.036 [0.005 - 0.2]                                      |
| Peptide 2       | 0.858                          | 0.0399         | [0.766 - 0.924]    | <0.0001 | 0.5581          | 93.75 [79.2 - 99.2]                        | 77.78 [64.4 - 88.0]                        | 4.22 [2.5 - 7.0]                                         | 0.08 [0.02 - 0.3]                                        |
| Peptide 3       | 0.952                          | 0.0222         | [0.880 - 0.988]    | <0.0001 | 0.687           | 93.33 [77.9 - 99.2]                        | 89.8 [77.8 - 96.6]                         | 9.15 [4.0 - 21.1]                                        | 0.074 [0.02 - 0.3]                                       |
| Peptide 4       | 0.951                          | 0.0241         | [0.876 - 0.987]    | <0.0001 | 0.6535          | 100 [85.2 - 100.0]                         | 90.74 [79.7 - 96.9]                        | 10.8 [4.7 - 24.9]                                        | 0 [ - ]                                                  |
| Peptide 1-2     | 0.939                          | 0.0256         | [0.870 - 0.978]    | <0.0001 | 0.946           | 100 [89.1 - 100.0]                         | 90.32 [80.1 - 96.4]                        | 10.33 [4.8 - 22.1]                                       | 0 [ - ]                                                  |
| Peptide 1-3     | 0.967                          | 0.0181         | [0.908 - 0.993]    | <0.0001 | 13.347          | 93.75 [79.2 - 99.2]                        | 96.77 [88.8 - 99.6]                        | 29.06 [7.4 - 114.0]                                      | 0.065 [0.02 - 0.2]                                       |
| Peptide 2-3     | 0.987                          | 0.0074         | [0.939 - 0.999]    | <0.0001 | 12.686          | 93.75 [79.2 - 99.2]                        | 90.32 [80.1 - 96.4]                        | 9.69 [4.5 - 20.8]                                        | 0.069 [0.02 - 0.3]                                       |
| Peptide 2-4     | 0.951                          | 0.0217         | [0.886 - 0.985]    | <0.0001 | 1.095           | 96.87 [83.8 - 99.9]                        | 88.71 [78.1 - 95.3]                        | 8.58 [4.3 - 17.3]                                        | 0.035 [0.005 - 0.2]                                      |
| Peptide 3-4     | 0.95                           | 0.0218         | [0.884 - 0.984]    | <0.0001 | 0.7893          | 100 [89.1 - 100.0]                         | 87.1 [76.1 - 94.3]                         | 7.75 [4.1 - 14.8]                                        | 0 [ - ]                                                  |
| Peptide 1-2-4   | 0.97                           | 0.0166         | [0.912 - 0.994]    | <0.0001 | 11.941          | 100 [89.1 - 100.0]                         | 91.94 [82.2 - 97.3]                        | 12.4 [5.4 - 28.7]                                        | 0 [ - ]                                                  |
| Peptide 1-3-4   | 0.972                          | 0.0155         | [0.915 - 0.995]    | <0.0001 | 12.237          | 100 [89.1 - 100.0]                         | 90.32 [80.1 - 96.4]                        | 10.33 [4.8 - 22.1]                                       | 0 [ - ]                                                  |
| Peptide 2-3-4   | 0.93                           | 0.026          | [0.853 - 0.974]    | <0.0001 | 11.743          | 100 [87.7 - 100.0]                         | 76.79 [63.6 - 87.0]                        | 4.31 [2.7 - 6.9]                                         | 0 [ - ]                                                  |
| Peptide 1-2-3-4 | 0.929                          | 0.0246         | [0.858 - 0.972]    | <0.0001 | 13.012          | 84.37 [67.2 - 94.7]                        | 87.5 [76.8 - 94.4]                         | 6.75 [3.5 - 13.1]                                        | 0.18 [0.08 - 0.4]                                        |
